# Supplementary material
Source: publisher site journal article supplement (https://www.dovepress.com/article/555785)
Supplement: Supplementary file 1 [file 555785%20Revised%20Supplementary%20Table.docx]

Supplemental TABLE 1 The GS system.

| The degree of stenosis（%） | Score | Lesion location | Score |
| --- | --- | --- | --- |
| 1-25 | 1 | The left main coronary artery | 5.0 |
| 26-50 | 2 | The proximal left anterior descending artery or proximal left circumflex artery | 2.5 |
| 51-75 | 4 | The mid-region of the left anterior descending artery | 1.5 |
| 76-90 | 8 | The distal left anterior descending artery, first diagonal branch | 1.0 |
| 91-99 | 16 | The mid-distal region of the left circumflex artery | 1.0 |
| 100 | 32 | Right coronary artery | 1.0 |
|  |  | The second diagonal and other segments | 0.5 |

GS: Gensini score

**Note:** The score for each lesion is calculated by multiplying the stenosis grade score by the lesion location score. The total score for each patient is the sum of all lesion scores.

The physician quantitatively assesses the degree of stenosis in each coronary artery lesion. First, a baseline score is determined based on the severity of coronary artery stenosis and the diameter of the stenotic segment. Specifically:

1%–25% stenosis: 1 point

26%–50% stenosis: 2 points

51%–75% stenosis: 4 points

76%–90% stenosis: 8 points

91%–99% stenosis: 16 points

100% stenosis: 32 points.

Then determine the corresponding coefficients based on different coronary artery branches, as follows: The left main coronary artery*5.0, The proximal left anterior descending artery or proximal left circumflex artery*2.5, The mid-region of the left anterior descending artery*1.5, The distal left anterior descending artery, first diagonal branch*1.0, The mid-distal region of the left circumflex artery*1.0, Right coronary artery*1.0, The second diagonal and other segments *0.5.

Finally, the physician multiplies the basic score for each coronary artery stenosis by the coefficient for that lesion site, yielding the score for that affected vessel. The sum of scores for all affected vessels constitutes the patient's total score, reflecting the severity of coronary artery stenosis.
